# Supplementary material
Source: PubMed Central journal article supplement (PMC6857011)
Supplement: DS1_JVDI_10.1177_1040638719847510.pdf [file DS1_JVDI_10.1177_1040638719847510.pdf]

Needle et al. Infection of eight mesocarnivores in New Hampshire and Vermont with a distinct clade of canine distemper virus in 2016–2017

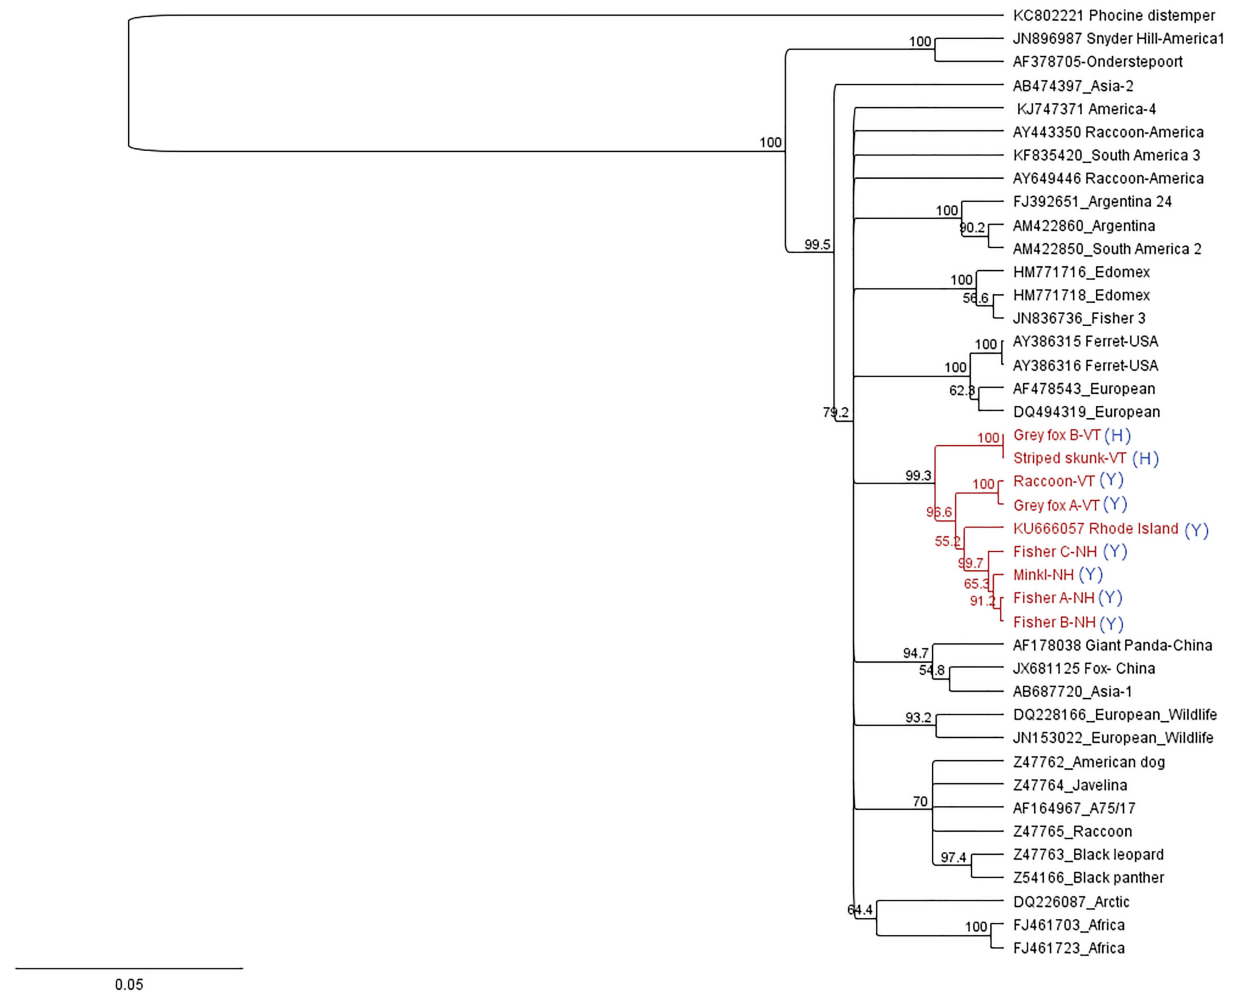

**Supplementary Figure 1.** Cladogram of the hemagglutinin (H) gene showing placement of the 8 animals (in red) infected with a distinct clade of canine distemper virus (CDV) in the context of other reported CDV isolates. The single previous other member of the clade is the central member of the clade KU66057 Rhode Island (in red). The amino acid encoded at position 549 in the H gene is noted in parentheses adjacent to each animal name (Y = tyrosine; H = histidine).

Distinct clade of CDV infecting mesocarnivores in NH and VT

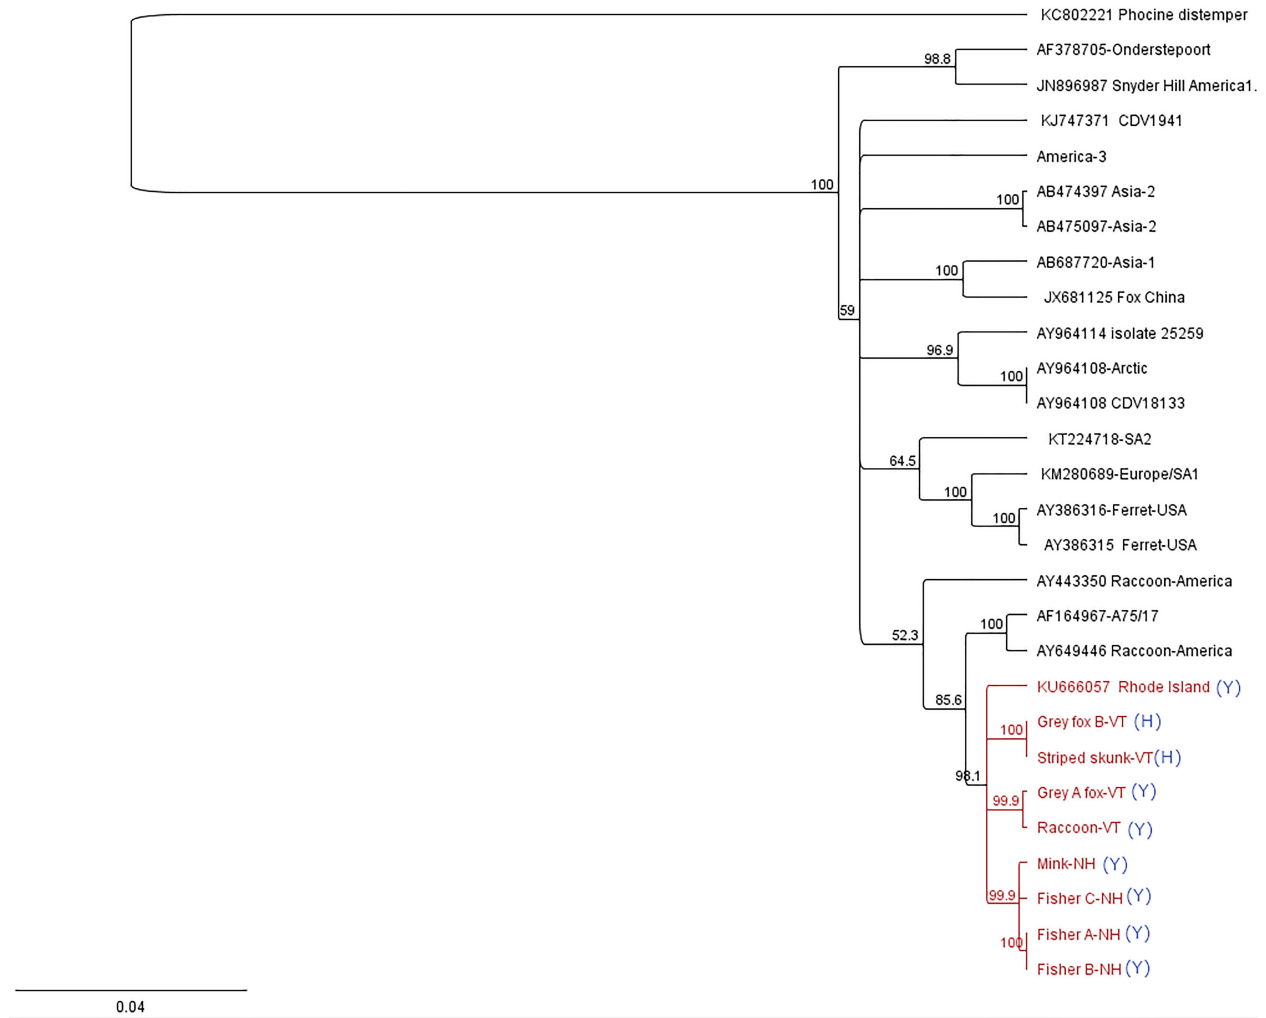

**Supplementary Figure 2.** Cladogram of the fusion (F) gene showing placement of the 8 animals (in red) infected with a distinct clade of canine distemper virus (CDV) in the context of other reported CDV isolates. The single previous other member of the clade is the central member of the clade KU66057 Rhode Island (in red). The amino acid encoded at position 549 in the hemagglutinin gene (Supplementary Fig. 1) is noted in parentheses adjacent to each animal name (Y = tyrosine; H = histidine).
